# Supplementary material
Source: PubMed Central journal article supplement (PMC3609630)
Supplement: Supp_Figure1.pdf [file Supp_Figure1.pdf]

## Supplementary Data

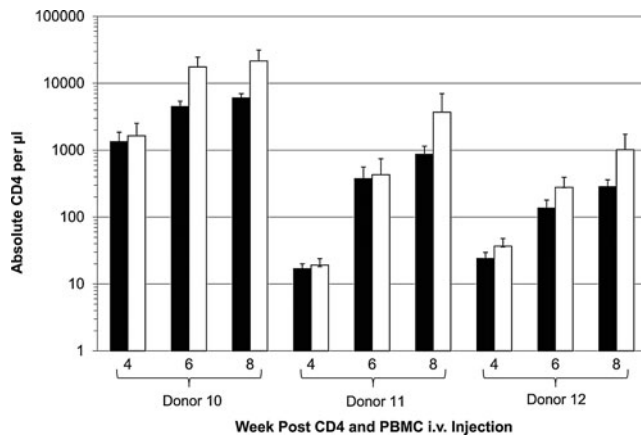

**SUPPLEMENTARY FIG. S1.** CD4 T-cell engraftment in animal biotoxicity studies. Shown are the average absolute CD4 counts per  $\mu$ l of blood in mice from Study 1. Error bars represent the standard error of the mean. Individual donors are indicated at bottom. Open bars represent groups infused with mock-transduced cells, and black bars represent groups infused with CCR5-ZFN modified cells. Blood counts were taken at weeks 4, 6, and 8.
