# Supplementary material
Source: PubMed Central journal article supplement (PMC3609630)
Supplement: Supp_Figure2.pdf [file Supp_Figure2.pdf]

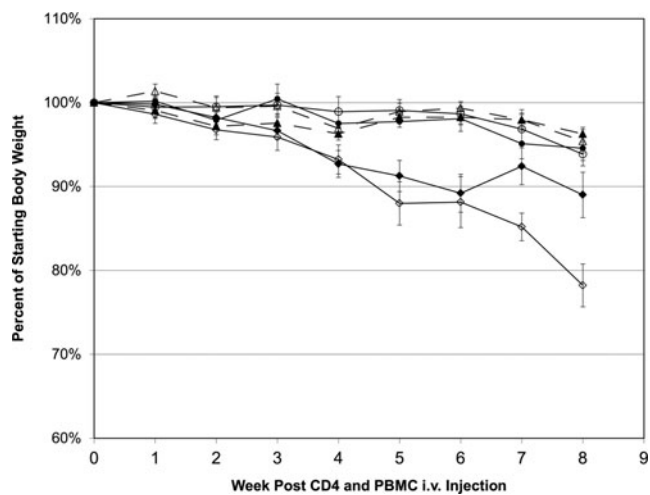

**SUPPLEMENTARY FIG. S2.** Body weight changes in animal biotoxicity studies. Shown is the percent change from starting body weight for each group of mice. Error bars represent standard error of the mean. donor 10, solid lines and diamond symbols; donor 11, dashed lines and triangles symbols; donor 12, solid lines and circle symbols. open symbols represent groups infused with mock-transduced cells, and closed symbols represent groups infused with CCR5-ZFN modified cells.
