# Supplementary material
Source: PubMed Central journal article supplement (PMC3609630)
Supplement: Supp_Table1.pdf [file Supp_Table1.pdf]

SUPPLEMENTARY TABLE S1. T-CELL RECEPTOR  $V\beta$   
 PERCENTAGES OF ALTERATION IN AN HIV-1+ DONOR  
 FOLLOWING EITHER RESEARCH SCALE OR CLINICAL  
 SCALE PROCESS FOR CCR5-ZFN GENOME MODIFICATION  
 AND *Ex Vivo* CD4 T-CELL EXPANSION

|               | <i>Day 0</i>       | <i>Research scale UTD</i> | <i>Clinical scale TD</i> |
|---------------|--------------------|---------------------------|--------------------------|
| $V\beta$ 1    | 10.95              | 10.70                     | 8.74                     |
| $V\beta$ 2    | 24.11              | 13.66                     | 11.90                    |
| $V\beta$ 3    | 13.44              | 10.88                     | 10.48                    |
| $V\beta$ 4    | 28.17              | 10.23                     | 11.60                    |
| $V\beta$ 5.1  | 17.91              | 13.00                     | 9.75                     |
| $V\beta$ 5.2  | 12.63              | 11.04                     | 11.27                    |
| $V\beta$ 6.1  | 14.44              | 11.79                     | 11.26                    |
| $V\beta$ 6.4  | 22.24              | 8.42                      | 7.99                     |
| $V\beta$ 6.5  | 14.29              | 11.24                     | 13.00                    |
| $V\beta$ 7    | 12.06              | 7.26                      | 7.00                     |
| $V\beta$ 8    | 33.06              | 9.09                      | 6.98                     |
| $V\beta$ 9    | 21.72              | 20.17                     | 18.91                    |
| $V\beta$ 11   | 12.07              | 10.28                     | 10.17                    |
| $V\beta$ 12.1 | 9.94               | 10.34                     | 7.04                     |
| $V\beta$ 12.2 | 11.29              | 7.56                      | 5.45                     |
| $V\beta$ 13.1 | 12.06              | 15.35                     | 10.10                    |
| $V\beta$ 13.5 | 10.81 <sup>a</sup> | 14.97                     | 13.41                    |
| $V\beta$ 14   | 33.83              | 3.93                      | 5.43                     |
| $V\beta$ 15   | 22.54              | 10.04                     | 9.56                     |
| $V\beta$ 16   | 34.74              | 12.97                     | 10.31                    |
| $V\beta$ 17   | 8.80               | 5.94                      | 6.41                     |
| $V\beta$ 18   | 11.04              | 11.13                     | 10.97                    |
| $V\beta$ 21   | 12.20              | 13.12                     | 12.11                    |
| $V\beta$ 22   | 17.50              | 16.37                     | 17.35                    |
| $V\beta$ 23   | 22.90              | 14.99                     | 14.19                    |
| $V\beta$ 24   | 15.57              | 11.57                     | 13.19                    |

<sup>a</sup>Low amount of  $V\beta$  transcripts affected reproducibility.  
 UTD, untransduced; TD, transduced.
